# Supplementary material
Source: MDPI journal article supplement (https://www.mdpi.com/2813-0227/3/4/21)
Supplement: s1 [file s1]

Archive with 2 entries (2 files):
- Supplementary File S1.pdf
- zoonoticdis-2513495-table s1.pdf
