# Supplementary material
Source: MDPI journal article supplement (https://www.mdpi.com/2813-0227/3/4/21)
Supplement: s1 [file s1]

**SUPPLEMENTARY TABLE S1. Characteristics of the included studies (55 publications containing a total of 82 reports)**

| Study               | Country    | Zoonotic disease  | Context during study conduct | Year of study start | Year of study end | Number of infected humans | Attack rate among humans per thousand | Number of deaths reported among humans | Case fatality rate among humans, per thousand | Reported animal host | Number of infected animals |
|---------------------|------------|-------------------|------------------------------|---------------------|-------------------|---------------------------|---------------------------------------|----------------------------------------|-----------------------------------------------|----------------------|----------------------------|
| Aceng 2021 [18]     | Uganda     | Anthrax           | Ongoing outbreak             | 2015                | 2017              | 68                        | 1.231884058                           | 2                                      | 29.41176471                                   | Cattle               | NA                         |
| Adesokan 2019 [19]  | Nigeria    | Tuberculosis      | Not outbreak                 | 2018                | 2018              | 52                        | 348.9932886                           | NA                                     | NA                                            | Cattle               | 2                          |
| Adjemian 2011 [20]  | Uganda     | Marburg           | Ongoing outbreak             | 2007                | 2007              | 4                         | NA                                    | 1                                      | 250                                           | Bats                 | 31                         |
| Ahmed 2020 [21]     | Sudan      | Echinococcosis    | Not outbreak                 | 2017                | 2018              | 20                        | 65.57377049                           | NA                                     | NA                                            | Dogs                 | NA                         |
| Ari 2011 [22]       | Kenya      | Brucellosis       | Ongoing outbreak             | 2005                | 2005              | 9                         | NA                                    | NA                                     | NA                                            | NA                   | NA                         |
| Ari 2011 [22]       | Kenya      | Leptospirosis     | Ongoing outbreak             | 2005                | 2005              | 3                         | NA                                    | NA                                     | NA                                            | NA                   | NA                         |
| Assenga 2015 [23]   | Tanzania   | Leptospirosis     | Not outbreak                 | 2012                | 2013              | 80                        | 299.6254682                           | NA                                     | NA                                            | Cattle               | 335                        |
| Bardonnet 2002 [24] | Mauritania | Echinococcosis    | Not outbreak                 | 1998                | 2000              | 3                         | NA                                    | NA                                     | NA                                            | Camel                | 22                         |
| Besombes 2019 [25]  | CAR        | Monkeypox         | Ongoing outbreak             | 2018                | 2018              | 6                         | NA                                    | NA                                     | NA                                            | NA                   | NA                         |
| Bett 2017 [26]      | Kenya      | Rift Valley Fever | Not outbreak                 | NA                  | NA                | 244                       | 219.4244604                           | NA                                     | NA                                            | NA                   | NA                         |
| Bett 2017 [26]      | Kenya      | Leptospirosis     | Not outbreak                 | NA                  | NA                | 244                       | 257.3839662                           | NA                                     | NA                                            | NA                   | NA                         |
| Bett 2017 [26]      | Kenya      | Brucellosis       | Not outbreak                 | NA                  | NA                | 366                       | 359.8820059                           | NA                                     | NA                                            | NA                   | NA                         |

|                          |              |                   |                  |      |      |     |             |    |             |        |    |
|--------------------------|--------------|-------------------|------------------|------|------|-----|-------------|----|-------------|--------|----|
| Bratcher 2021 [27]       | DRC          | Ebola             | Not outbreak     | 2015 | 2017 | 113 | 82.72327965 | NA | NA          | NA     | NA |
| Chirundu 2009 [28]       | Zimbabwe     | Anthrax           | Ongoing outbreak | 2004 | 2004 | 53  | 53.21285141 | NA | NA          | Cattle | NA |
| Cook 2017 [29]           | Kenya        | Rift Valley Fever | Not outbreak     | 2010 | 2012 | 15  | 8.060182697 | NA | NA          | Cattle | NA |
| Durski 2018 [30]         | Liberia      | Monkeypox         | Ongoing outbreak | 2017 | 2017 | 2   | NA          | 0  | 0           | NA     | NA |
| Durski 2018 [30]         | Sudan        | Monkeypox         | Ongoing outbreak | 2005 | 2005 | 19  | NA          | 0  | 0           | NA     | NA |
| Durski 2018 [30]         | Sierra Leone | Monkeypox         | Ongoing outbreak | 2014 | 2017 | 2   | NA          | 1  | 500         | NA     | NA |
| Durski 2018 [30]         | CAR          | Monkeypox         | Ongoing outbreak | 2001 | 2017 | 37  | NA          | 4  | 108.1081081 | NA     | NA |
| Durski 2018 [30]         | Nigeria      | Monkeypox         | Ongoing outbreak | 2017 | 2018 | 89  | NA          | 6  | 67.41573034 | NA     | NA |
| Edia-Asuke 2015 [31]     | Nigeria      | Cysticercosis     | Not outbreak     | 2012 | 2013 | 43  | 143.3333333 | NA | NA          | Pigs   | NA |
| El Zowalaty 2022 [32]    | South Africa | Influenza A       | Not outbreak     | 2018 | 2018 | 44  | 523.8095238 | NA | NA          | Pig    | 6  |
| Faye 2007 [33]           | Mauritania   | Rift Valley Fever | Ongoing outbreak | 2003 | 2003 | 25  | 255.1020408 | 4  | 160         | Cattle | 25 |
| Faye 2010 [34]           | Senegal      | Leishmaniasis     | Not outbreak     | 2005 | 2008 | 44  | 330.8270677 | NA | NA          | Dogs   | 57 |
| Gray 2015 [35]           | Madagascar   | Rift Valley Fever | Not outbreak     | 2010 | 2012 | 2   | 15.7480315  | NA | NA          | Cattle | NA |
| Gray 2015 [35]           | Kenya        | Rift Valley Fever | Not outbreak     | 2010 | 2012 | 21  | 48.8372093  | NA | NA          | Cattle | NA |
| Grossi-Soyster 2019 [36] | Kenya        | Rift Valley Fever | Not outbreak     | 2010 | 2012 | 267 | 63.22519536 | NA | NA          | NA     | NA |

|                          |               |                   |                  |      |      |     |             |     |             |                         |      |
|--------------------------|---------------|-------------------|------------------|------|------|-----|-------------|-----|-------------|-------------------------|------|
| Hikufe 2019 [37]         | Namibia       | Rabies            | Not outbreak     | 2011 | 2017 | 113 | NA          | NA  | NA          | Dogs, Kudus, Jackals... | 1907 |
| Jansen 2018 [38]         | South Africa  | Rift Valley Fever | Ongoing outbreak | 2018 | 2018 | 4   | NA          | NA  | NA          | Cattle                  | NA   |
| Japhet 2019 [39]         | Nigeria       | Astrovirus        | Not outbreak     | 2012 | 2013 | 7   | 67.96116505 | NA  | NA          | NA                      | NA   |
| Jeffs 2007 [40]          | Angola        | Marburg           | Ongoing outbreak | 2005 | 2005 | 374 | 2.077777778 | 329 | 879.6791444 | NA                      | NA   |
| Kaddu-Mulindwa 2001 [41] | Uganda        | E. coli           | Not outbreak     | 1997 | 1998 | 6   | 142.8571429 | NA  | NA          | Cattle                  | 45   |
| Kalthan 2016 [42]        | CAR           | Monkeypox         | Ongoing outbreak | 2015 | 2016 | 12  | 0.228741351 | 3   | 250         | NA                      | NA   |
| Kiambi 2012 [43]         | Kenya         | Brucellosis       | Not outbreak     | 2010 | 2011 | 59  | 153.6458333 | NA  | NA          | NA                      | NA   |
| Lagare 2019 [44]         | Niger         | Rift Valley Fever | Ongoing outbreak | 2016 | 2016 | 17  | 42.60651629 | 33  | 1941.176471 | Cattle                  | 24   |
| Leendertz 2017 [45]      | Cote d'Ivoire | Monkeypox         | Not outbreak     | 2006 | 2007 | 38  | 188.1188119 | NA  | NA          | NA                      | NA   |
| Leendertz 2017 [45]      | Cote d'Ivoire | Monkeypox         | Not outbreak     | 2012 | 2012 | 19  | 253.3333333 | NA  | NA          | NA                      | NA   |
| Leendertz 2017 [45]      | DRC           | Monkeypox         | Not outbreak     | 2011 | 2012 | 29  | 256.6371681 | NA  | NA          | NA                      | NA   |
| Leroy 2009 [46]          | South Sudan   | Ebola             | Ongoing outbreak | 2004 | 2004 | 17  | NA          | 7   | 411.7647059 | NA                      | NA   |
| Leroy 2009 [46]          | Congo         | Ebola             | Ongoing outbreak | 2005 | 2005 | 12  | NA          | 10  | 833.3333333 | NA                      | NA   |
| Leroy 2009 [46]          | Congo         | Ebola             | Ongoing outbreak | 2003 | 2003 | 35  | NA          | 29  | 828.5714286 | Monkeys                 | NA   |
| Leroy 2009 [46]          | Uganda        | Ebola             | Ongoing outbreak | 2007 | 2007 | 116 | NA          | 30  | 258.6206897 | NA                      | NA   |

|                       |            |                |                  |      |      |       |             |     |             |          |    |
|-----------------------|------------|----------------|------------------|------|------|-------|-------------|-----|-------------|----------|----|
| Leroy 2009 [46]       | Congo      | Ebola          | Ongoing outbreak | 2001 | 2002 | 59    | NA          | 44  | 745.7627119 | Gorillas | NA |
| Leroy 2009 [46]       | Gabon      | Ebola          | Ongoing outbreak | 2001 | 2002 | 65    | NA          | 53  | 815.3846154 | Gorillas | NA |
| Leroy 2009 [46]       | Congo      | Ebola          | Ongoing outbreak | 2003 | 2003 | 143   | NA          | 128 | 895.1048951 | Gorillas | NA |
| Leroy 2009 [46]       | DRC        | Ebola          | Ongoing outbreak | 2007 | 2007 | 264   | NA          | 186 | 704.5454545 | Bats     | NA |
| Leroy 2009 [46]       | Uganda     | Ebola          | Ongoing outbreak | 2000 | 2000 | 425   | NA          | 224 | 527.0588235 | NA       | NA |
| Mandja 2019 [47]      | DRC        | Monkeypox      | Ongoing outbreak | 2000 | 2015 | 19273 | 0.22179589  | NA  | NA          | NA       | NA |
| Mgode 2019 [48]       | Tanzania   | Leptospirosis  | Not outbreak     | NA   | NA   | 72    | 158.2417582 | NA  | NA          | Rodents  | 4  |
| Mirambo 2018 [49]     | Tanzania   | Leptospirosis  | Not outbreak     | 2017 | 2017 | 26    | 104         | NA  | NA          | NA       | NA |
| Mirambo 2018 [49]     | Tanzania   | Brucellosis    | Not outbreak     | 2017 | 2017 | 121   | 484         | NA  | NA          | NA       | NA |
| Monamele 2019 [50]    | Cameroon   | Influenza A    | Ongoing outbreak | 2016 | 2016 | 15    | 22.62443439 | NA  | NA          | Poultry  | 58 |
| Muadica 2020 [51]     | Mozambique | Enterocytozoon | Not outbreak     | 2016 | 2019 | 9     | 7.217321572 | NA  | NA          | NA       | NA |
| Mulugeta 2020 [52]    | Ethiopia   | Toxoplasmosis  | Not outbreak     | 2015 | 2016 | 158   | 678.111588  | NA  | NA          | Cats     | NA |
| Munang'andu 2012 [53] | Zambia     | Anthrax        | Ongoing outbreak | 1999 | 2007 | 1790  | NA          | 83  | 46.36871508 | Cattle   | NA |
| Munyua 2021 [54]      | Kenya      | Brucellosis    | Not outbreak     | 2015 | 2016 | 20    | 4.214075011 | NA  | NA          | NA       | NA |
| Nabukenya 2013 [55]   | Uganda     | Brucellosis    | Not outbreak     | 2007 | 2007 | 24    | 103.4482759 | NA  | NA          | Cattle   | NA |

|                         |              |                   |                  |      |      |     |             |    |             |           |     |
|-------------------------|--------------|-------------------|------------------|------|------|-----|-------------|----|-------------|-----------|-----|
| Naidoo 2020 [56]        | South Africa | Leptospirosis     | Not outbreak     | 2015 | 2015 | 2   | NA          | 1  | 500         | Rats      | 8   |
| Nanyende 2010 [57]      | Kenya        | Brucellosis       | Not outbreak     | 2006 | 2007 | 30  | 172.4137931 | NA | NA          | Cattle    | 74  |
| Ngere 2022 [58]         | Kenya        | MERSCOV           | Ongoing outbreak | 2018 | 2020 | 3   | 11.45038168 | NA | NA          | Camel     | 124 |
| Nimo-Paintsil 2019 [59] | Ghana        | Lassa virus       | Not outbreak     | 2010 | 2011 | 34  | 51.75038052 | NA | NA          | Rodents   | 2   |
| Nimo-Paintsil 2019 [59] | Ghana        | Puumala           | Not outbreak     | 2010 | 2011 | 74  | 112.6331811 | NA | NA          | Rodents   | NA  |
| Nimo-Paintsil 2019 [59] | Ghana        | Dobrava           | Not outbreak     | 2010 | 2011 | 80  | 121.7656012 | NA | NA          | Rodents   | NA  |
| Nimo-Paintsil 2019 [59] | Ghana        | Leptospirosis     | Not outbreak     | 2010 | 2011 | 140 | 213.0898021 | NA | NA          | Rodents   | NA  |
| Nyakarahuka 2018 [60]   | Uganda       | Rift Valley Fever | Not outbreak     | 2016 | 2016 | 88  | 134.351145  | NA | NA          | Cattle    | 133 |
| Pembi 2022 [61]         | Nigeria      | Monkeypox         | Ongoing outbreak | 2017 | 2021 | 199 | NA          | NA | NA          | NA        | NA  |
| Qiu 2019 [62]           | Zambia       | Borrelia          | Not outbreak     | 2014 | 2016 | 1   | NA          | NA | NA          | Bats      | 64  |
| Ramadan 2022 [63]       | South Sudan  | Rift Valley Fever | Not outbreak     | 2017 | 2018 | 9   | 0.088098827 | 3  | 333.3333333 | Livestock | 9   |
| Richard 2016 [64]       | Gabon        | HTLV              | Not outbreak     | NA   | NA   | 2   | 6.666666667 | NA | NA          | Gorillas  | 2   |
| Schoonman 2009 [65]     | Tanzania     | Leptospirosis     | Not outbreak     | 2005 | 2005 | 30  | 150.7537688 | NA | NA          | NA        | NA  |
| Simpson 2018 [66]       | South Africa | Rift Valley Fever | Not outbreak     | 2012 | 2013 | 0   | 0           | NA | NA          | NA        | NA  |
| Simpson 2018 [66]       | South Africa | Brucellosis       | Not outbreak     | 2012 | 2013 | 1   | 7.246376812 | NA | NA          | NA        | NA  |

|                          |              |                   |                  |      |      |      |             |    |             |        |    |
|--------------------------|--------------|-------------------|------------------|------|------|------|-------------|----|-------------|--------|----|
| Simpson 2018 [66]        | South Africa | Bartonellosis     | Not outbreak     | 2012 | 2013 | 7    | 50.72463768 | NA | NA          | NA     | NA |
| Simpson 2018 [66]        | South Africa | Leptospirosis     | Not outbreak     | 2012 | 2013 | 19   | 137.6811594 | NA | NA          | NA     | NA |
| Simpson 2018 [66]        | South Africa | Q fever           | Not outbreak     | 2012 | 2013 | 67   | 489.0510949 | NA | NA          | NA     | NA |
| Simpson 2018 [66]        | South Africa | Rickettsiosis     | Not outbreak     | 2012 | 2013 | 104  | 770.3703704 | NA | NA          | NA     | NA |
| Sulyok 2014 [67]         | DRC          | Pentastomiasis    | Not outbreak     | 2008 | 2012 | 4    | 1           | NA | NA          | Snakes | NA |
| Tappe 2015 [68]          | DRC          | Pentastomiasis    | Not outbreak     | 2012 | 2014 | 2    | NA          | NA | NA          | Snakes | NA |
| Teklu 2017 [69]          | Ethiopia     | Rabies            | Not outbreak     | 2012 | 2015 | 2180 | NA          | NA | NA          | Dogs   | NA |
| Tigoi 2020 [70]          | Kenya        | Rift Valley Fever | Not outbreak     | 2014 | 2015 | 440  | 363.6363636 | NA | NA          | NA     | NA |
| Wolfe 2004 [71]          | Cameroon     | SIV               | Not outbreak     | 2003 | 2003 | 179  | 162.8753412 | NA | NA          | NA     | NA |
| Yinka-Ogunleye 2018 [72] | Nigeria      | Monkeypox         | Ongoing outbreak | 2017 | 2017 | 42   | NA          | 1  | 23.80952381 | NA     | NA |
