# Supplementary material
Source: MDPI journal article supplement (https://www.mdpi.com/2813-0227/3/4/21)
Supplement: s1 [file s1 › Supplementary File S1.pdf]

# **ZOONOTIC DISEASES IN SUB-SAHARAN AFRICA: A SYSTEMATIC REVIEW AND META-ANALYSIS**

## *Search strings for the retrieval of relevant literature*

### **1. PubMed Search strings (search date: 21-11-2022)**

(Zoonoses[MeSH]) AND ("Epidemics"[Mesh] OR outbreak\*[TIAB] OR emerg\*[TIAB] OR reserv\*[TIAB]) AND ("Africa South of the Sahara"[Mesh])

**Hits: 383**

### **2. Cochrane Search strings (search date: 21-11-2022)**

zoono\* (Search among Title Abstracts Keywords) in Title Abstract Keyword (Word variations have been searched)

**Hits: 3 + 183**

### **3. Scopus Search strings (search date: 21-11-2022)**

TITLE-ABS-KEY(zoono\*) AND TITLE-ABS-KEY("Epidemic\*" OR "outbreak\*" OR "\*emerg\*" OR "reserv\*") AND ( INDEXTERMS ( "Africa South of the Sahara" ) )

**Hits: 58**
